# Supplementary material
Source: publisher site journal article supplement (https://static.cambridge.org/content/id/urn:cambridge.org:id:article:S0022112016002512/resource/name/FLM1600251supp.zip)
Supplement: Supplementary file 1 [file FLM1600251supp.zip]

Archive with 2 entries (2 files):
- flm_1600251_SupplementaryMateral.tar
- flm_1600251_SupplementaryMateral.pdf
